1 **Optogenetic delivery of trophic signals**

2 **in a genetic model of Parkinson's disease**

3  
4  
5 Álvaro Inglés-Prieto<sup>1,#</sup>, Nikolas Furthmann<sup>2</sup>, Samuel Crossman<sup>3,4</sup>, Nina Hoyer<sup>5,§</sup>, Meike  
6 Petersen<sup>5</sup>, Vanessa Zheden<sup>1</sup>, Julia Biebl<sup>1</sup>, Eva Reichhart<sup>1,3,4</sup>, Attila György<sup>1</sup>, Daria Siekhaus<sup>1</sup>,  
7 Peter Soba<sup>5</sup>, Konstanze F. Winklhofer<sup>2</sup> & Harald Janovjak<sup>1,3,4,\*</sup>

8  
9  
10 <sup>1</sup> Institute of Science and Technology Austria (IST Austria), 3400 Klosterneuburg, Austria

11 <sup>2</sup> Molecular Cell Biology, Institute of Biochemistry and Pathobiochemistry, Ruhr University  
12 Bochum, 44801 Bochum, Germany

13 <sup>3</sup> Australian Regenerative Medicine Institute (ARMI), Faculty of Medicine, Nursing and Health  
14 Sciences, Monash University, Clayton/Melbourne, VIC 3800, Australia

15 <sup>4</sup> European Molecular Biology Laboratory Australia (EMBL Australia), Monash University,  
16 Clayton/Melbourne, VIC 3800, Australia

17 <sup>5</sup> Center for Molecular Neurobiology (ZMNH), University Medical Center Hamburg-  
18 Eppendorf, 20251 Hamburg, Germany

19 <sup>#</sup> Current address: CeMM, Research Center for Molecular Medicine of the Austrian Academy  
20 of Sciences, 1090 Vienna, Austria

21 <sup>§</sup> Current address: DFKI GmbH, Robotics Innovation Center, 28359 Bremen, Germany

22  
23  
24 \* Correspondence: [harald.janovjak@monash.edu](mailto:harald.janovjak@monash.edu)

25  
26 **Keywords:**

27 Optogenetics, cell signaling, RET receptor, photoreceptor, LOV domain, PINK1, Parkinson's  
28 disease, synthetic physiology

29 **Abstract**

30 Optogenetics has been harnessed to shed new mechanistic light on current therapies and to  
31 develop future treatment strategies. This has been to date achieved by the correction of  
32 electrical signals in neuronal cells and neural circuits that are affected by disease. In  
33 contrast, the optogenetic delivery of trophic biochemical signals, which support cell survival  
34 and thereby may modify progression of degenerative disorders, has never been  
35 demonstrated in an animal disease model. Here, we reengineered the human and  
36 *Drosophila melanogaster* REarranged during Transfection (hRET and dRET) receptors to be  
37 activated by light, creating one-component optogenetic tools termed Opto-hRET and Opto-  
38 dRET. Upon blue light stimulation, these receptors robustly induced the MAPK/ERK  
39 proliferative signaling pathway in cultured cells. In PINK1<sup>B9</sup> flies that exhibit loss of PTEN-  
40 induced putative kinase 1 (PINK1), a kinase associated with familial Parkinson's disease  
41 (PD), light activation of Opto-dRET suppressed mitochondrial defects, tissue degeneration  
42 and behavioral deficits. In human cells with PINK1 loss-of-function, mitochondrial  
43 fragmentation was rescued using Opto-dRET *via* the PI3K/NF-κB pathway. Our results  
44 demonstrate that a light-activated receptor can ameliorate disease hallmarks in a genetic  
45 model of PD. The optogenetic delivery of trophic signals is cell type-specific and reversible  
46 and thus has the potential to overcome limitations of current strategies towards a spatio-  
47 temporal regulation of tissue repair.

48 **Significance Statement**

49 The death of physiologically important cell populations underlies of a wide range of  
50 degenerative disorders, including Parkinson's disease (PD). Two major strategies to counter  
51 cell degeneration, soluble growth factor injection and growth factor gene therapy, can lead to  
52 the undesired activation of bystander cells and non-natural permanent signaling responses.  
53 Here, we employed optogenetics to deliver cell type-specific pro-survival signals in a genetic  
54 model of PD. In *Drosophila* and human cells exhibiting loss of the PINK1 kinase, akin to  
55 autosomal recessive PD, we efficiently suppressed disease phenotypes using a light-  
56 activated tyrosine kinase receptor. This work demonstrates a spatio-temporally precise  
57 strategy to interfere with degeneration and may open new avenues towards tissue repair in  
58 disease models.

## 59 **Introduction**

60 Biology occurs over a wide range of time and length scales, from milliseconds and  
61 nanometers for protein folding, to days and centimeters for organism development. In recent  
62 years, powerful research methods have been developed that permit the manipulation of  
63 biological processes on even the smallest length and shortest time scales. In optogenetics,  
64 natural or reengineered photoreceptors are expressed in genetically defined cell populations  
65 to optically activate or inhibit, e.g., neuronal action potential firing or cell signaling. The use of  
66 light provides unprecedented precision in space and time as a way to answer previously  
67 unresolvable questions in a multitude of disciplines, including microbiology,  
68 cell/developmental biology, synthetic biology, and neuroscience. In particular, spatio-  
69 temporally precise perturbation of selected cells in intact organisms can reveal cause-  
70 consequence-relationships that are a critical determination for understanding central nervous  
71 system function or animal development (1-3). Optogenetics also provides access to the  
72 reversible and rapid activation of cell signaling pathways that is required for dissection of  
73 their dynamic properties (4, 5) and for development of new drug discovery platforms (6).  
74 Inspired by these successes, optogenetics is continuously translated into new research  
75 areas, including disease mechanism and therapy.

76         Shortly after its inception, optogenetics was beginning to be employed in the study of  
77 neural circuits that are known to be affected by neurological and neurodegenerative  
78 disorders, including spinal cord injury, stroke and Parkinson's disease (PD) (7, 8). In this  
79 field, optogenetics has shed new light on the mechanisms of currently utilized therapies (e.g.,  
80 deep brain stimulation in PD) or therapies of the future (e.g., stem cell-based tissue  
81 regeneration) (9, 10). This work was followed by the development of light-gated prosthetic  
82 approaches in which a genetically introduced photoreceptor senses either natural light, e.g.  
83 for vision restoration (11), or light from a prosthetic source, e.g. for heart or skeletal muscle  
84 pacing (12, 13). Notably, these pioneering studies harnessed optogenetics to excite or inhibit  
85 electrical signals through regulated ion flow ions across the cell membrane. In apparent  
86 contrast, the optogenetic delivery of trophic signals, which support cell survival and are

87 central to treatment strategies in a variety of degenerative disorders, has never been  
88 demonstrated in a disease model. It is unclear if this is feasible as hypo- or hyperactivity of  
89 pro-survival pathways is linked to undesired cellular outcomes (see below).

90 We and others have recently engineered light-activated variants of key signaling  
91 proteins that now provide a basis for the optogenetic delivery of trophic signals. Particular  
92 success was reported for receptor tyrosine kinases (RTKs) (14-18). RTKs are expressed in  
93 virtually all human cell types and respond to growth factors (GFs) with conformational  
94 changes and/or oligomerization state changes that result in receptor *trans*-phosphorylation.  
95 *Trans*-phosphorylation is then followed by recruitment of intracellular secondary messengers  
96 in, e.g., the mitogen-activated protein kinase/extracellular signal-regulated kinase  
97 (MAPK/ERK) or phosphatidylinositol-3 kinase/AKT (PI3K/AKT) signaling pathways. Because  
98 of their ability to activate these proliferative and pro-survival pathways, RTKs are prime  
99 targets in several neurodegenerative disorders. In the context of PD, the RET RTK (19) has  
100 been intensively investigated in both preclinical and clinical studies. hRET is activated by  
101 glial cell line-derived neurotrophic factor (GDNF) family ligands (GFLs; these are GDNF,  
102 neurturin, artemin, and persephin) that bind GDNF family receptor  $\alpha$  (GFR $\alpha$ ) co-receptors  
103 (GFR  $\alpha$ 1-4) to recruit dimeric RET into a ternary complex (**Figure 1A**). GFLs are linked to the  
104 development and maintenance of dopaminergic (DA) midbrain neurons and have been  
105 pursued as disease-modifying agents in PD, either by local injection or by gene delivery  
106 using adeno-associated viruses (20, 21). Despite initial success in animal models, outcomes  
107 in clinical trials were limited (22, 23), which was attributed to difficulties in GFL delivery,  
108 limited responsiveness of the targeted DA neurons and advanced PD in some of the  
109 recruited patients. In addition, there are concerns that the continuous delivery of GFLs can  
110 lead to counter-productive compensatory effects (24-27). These observations and  
111 considerations have highlighted a need for methods that can control the GFL-RET-axis in a  
112 reversible and more precise manner (28, 29).

113 Here, we explored optogenetics as a means for delivery of trophic signals in a genetic  
114 model of PD. We first reengineered full-length hRET and its *Drosophila* orthologue dRET

115 (30-32) to be activated by light in optogenetic tools termed Opto-hRET and Opto-dRET. We  
116 then showed that temporally precise dRET activation *in vivo* can be used to induce  
117 degeneration in a tissue sensitive to ectopic RTK signaling. Optogenetic delivery of RET  
118 signals was then successfully applied in a genetic fly model of PD. Mutations in the *PINK1*  
119 gene are linked to autosomal recessive PD (33-35), and *Drosophila* has been shown to be a  
120 suitable model to study consequences of PINK1 loss-of-function (36-38). We suppressed  
121 *Drosophila* phenotypes associated with PINK1 deficiency and identified the involved  
122 downstream signaling pathways in a human cellular model. This work demonstrates the use  
123 of optogenetics as a cell-type specific and remote controlled method to exert beneficial  
124 trophic effects of in a genetic disease model.

125

## 126 **Results**

### 127 *Light-activated hRET and dRET receptors*

128 hRET assembles in dimers in the activated ternary GFL<sub>2</sub>-GFR<sub>α2</sub>-RET<sub>2</sub> complex (39, 40)  
129 (**Figure 1A**) and forced dimerization by mutations or synthetic binding domains has been  
130 shown to induce signaling of hRET (41, 42) and dRET (43, 44). Based on these  
131 observations, we converted hRET and dRET into optogenetic tools by incorporating a light-  
132 activated dimerization switch. To achieve this switch, we utilized the light-oxygen-voltage-  
133 sensing (LOV) domain of the AUREOCHROME1 photoreceptor from the yellow-green algae  
134 *Vaucheria frigida* (AU1-LOV) (45) (**Figure 1B**). AU1-LOV is a member of the large LOV  
135 domain superfamily and responds to blue light with formation of a symmetric homodimer (46)  
136 (**Figure S1**). AU1-LOV is smaller than other photoreceptors commonly used in optogenetics  
137 (145 aa in length; this corresponds to ~a third of the length of cryptochromes or  
138 phytochromes) (47, 48) and relaxes slower than many other LOV domains from the light-  
139 activated 'lit' state (that is predominantly dimeric) to the dark-adapted state (that is  
140 predominantly monomeric; relaxation time constant ~600 s) (49). We and others have shown  
141 that small size and slow cycling make AU1-LOV well suited for assembly and activation of  
142 membrane receptors (14, 16, 17, 50). We placed AU1-LOV at the far C-terminus of the RET

143 receptors because fluorescent proteins (FPs) were previously incorporated at this site  
144 without negative impact on receptor signaling or trafficking (51, 52). To functionally test the  
145 generated Opto-hRET and Opto-dRET, we took advantage of the fact that *Drosophila* RTKs  
146 can couple to the mammalian MAPK/ERK pathway *via* Ras (44). We and others utilize  
147 human embryonic kidney 293 (HEK293) cells for testing new optogenetic methods because  
148 these cells do not exhibit native light-induced signaling events. Using transcriptional reporters  
149 (14, 47), we found robust induction of MAPK/ERK signaling upon blue light stimulation of  
150 HEK293 cells transfected with Opto-hRET and Opto-dRET (intensity (I) = 250  $\mu\text{W}/\text{cm}^2$ ,  
151 wavelength ( $\lambda$ ) = 470 nm) (**Figure 1C**). Whilst Opto-hRET activated transcriptional responses  
152 more strongly than Opto-dRET, Opto-dRET activation levels were comparable to those  
153 reached by the Opto-dRET<sup>MEN2B</sup> variant (**Figure 1C**). Opto-dRET<sup>MEN2B</sup> contains a Met to Thr  
154 gain-of-function substitution in the kinase domain that was discovered in multiple endocrine  
155 neoplasia (MEN) Type 2B as causative for potent receptor hyperactivation in the absence of  
156 GFLs (43, 53). These results show that signaling activity can be induced by blue light through  
157 Opto-h/dRET receptors.

158

### 159 *Opto-dRET function in vivo*

160 We next tested if Opto-dRET can be applied *in vivo* to conduct a temporally-targeted gain-of-  
161 function experiment (**Figure 2A**). We choose the *Drosophila* retina for this experiment  
162 because RTKs and their downstream pathways are tightly regulated during its  
163 morphogenesis, and because RTK hyperactivation during retina development results in  
164 marked phenotypes. For instance, two RTKs, the *Drosophila* epidermal growth factor  
165 receptor (DER) and Sevenless, orchestrate retinal cell growth, differentiation and regulated  
166 death (54, 55). These RTKs act in late larval and early pupal stages to form the fourteen cells  
167 that compose each ommatidium unit eye and the ommatidial lattice (56). Hyperactivation of  
168 RTK signaling during these stages has been shown to result in irregular ommatidia size and  
169 spacing leading to a disrupted tissue pattern termed ‘roughening’ (57). We generated  
170 transgenic flies in which the *Opto-dRET* gene is placed downstream of five *UAS* elements

171 **(Figure S2)**. We also generate analogous flies expressing the constitutively-active Opto-  
172 dRET<sup>MEN2B</sup>. We then targeted Opto-dRET or Opto-dRET<sup>MEN2B</sup> to the retina using the *GMR*-  
173 *GAL4* driver, which induces expression in cells located posterior of a morphogenetic furrow  
174 that sweeps in anterior direction to initiate mitosis and cell differentiation (55). In Opto-  
175 dRET<sup>MEN2B</sup> flies, scanning electron microscopy (SEM) revealed a marked rough retina  
176 phenotype (compare **Figure 2B** and **C**). Roughening was previously observed in flies  
177 expressing dRET<sup>MEN2B</sup> (43), and based on the severe outcome observed for Opto-dRET<sup>MEN2B</sup>  
178 we concluded that AU1-LOV attachment does not negatively impact receptor function. We  
179 next illuminated control flies and Opto-dRET flies in a time window that captures ommatidia  
180 and lattice formation (from third instar larva through to the second day after pupariation;  $I =$   
181  $385 \mu\text{W}/\text{cm}^2$ ,  $\lambda = 470 \text{ nm}$ ; **Figure 2A**). In control flies without Opto-dRET, we did not observe  
182 light-induced roughening indicating that light alone did not have an effect on the retina  
183 (compare **Figure 2D** and **E**; in agreement with previous studies, we observed mild  
184 phenotypes upon *GAL4* expression with the *GMR* driver (58)). In apparent contrast, we found  
185 that light stimulation resulted in a marked increase in roughening in Opto-dRET flies  
186 (compare **Figure 2F** and **G**). To quantify this effect, we manually metered in each retina  
187 image the ‘fused area’ (the area without identifiable ommatidia) and also applied  
188 computational methods to count individual ommatidia (~600 ommatidia can be assigned in  
189 our frontal view images) as two measures of tissue integrity. We found that upon illumination  
190 the fused area increased and the number of identified structures decreased specifically in the  
191 illuminated Opto-dRET flies (**Figure 2H** and **I**). For these and control flies, we also  
192 determined lattice regularity, which is defined as the ratio of the mean and the standard  
193 deviation (SD) of the ommatidia nearest-neighbor distance (NND) distribution (59). Regularity  
194 decreased from  $3.98 \pm 0.39$  in WT flies to  $2.15 \pm 0.55$  in illuminated Opto-dRET flies, and  
195 these values are indicative of near-perfect regularity and near-random assembly,  
196 respectively (60). The potent effects induced by Opto-dRET upon light stimulation and the  
197 lack of light responses in the absence of Opto-dRET establish the suitability of this  
198 optogenetic approach to modify tissue behavior *in vivo*.



199

## 200 *Suppression of defects in a genetic model of PD*

201 With Opto-dRET in hand, we went on to explore if defects in a genetic disease model can be  
202 ameliorated using optogenetics (**Figure 3A**). PINK1 is a Ser/Thr kinase that localizes to  
203 mitochondria and supports their integrity and function. Loss-of-function mutations and  
204 dominant negative mutations in the *PINK1* gene are associated with autosomal recessive PD  
205 (33-35). In *Drosophila*, loss of X-linked *PINK1* leads to a striking phenotype, including tissue  
206 degeneration, locomotor defects and disruption of mitochondrial structure and function (61-  
207 64). To test if optogenetics can suppress phenotypes associated with PINK1 deficiency, we  
208 expressed Opto-dRET in indirect flight muscles (IFMs) of PINK1<sup>B9</sup> flies using the *MEF2*-  
209 *GAL4* driver (65). IFMs are frequently studied in *Drosophila* models of PD and PINK1 loss-of-  
210 function leads to a marked 'crushed' thorax phenotype and reduced locomotion. We first  
211 compared PINK1<sup>B9</sup> flies to Opto-dRET PINK1<sup>B9</sup> flies that were not illuminated. Similar  
212 penetrance of thoracic defects (58 and 61% of flies exhibited a crushed thorax, respectively)  
213 shows that the engineered optogenetic receptor did not affect the phenotype in the absence  
214 of light (**Figure 3B**). When proceeding to light stimulation, we took into consideration that the  
215 opaque case and cuticle of pupa and adults may reduce blue light penetration to IFMs. To  
216 address this, we first confirmed that AU1-LOV can be activated by light of 1-5  $\mu\text{W}/\text{cm}^2$   
217 intensity, which corresponds to the product of minimal blue light transmission through the  
218 case or cuticle ( $\sim 0.5\%$  (66, 67)) and the light intensity applied in our light chambers ( $I = 320$   
219  $\mu\text{W}/\text{cm}^2$ ; **Figure S3A**). We observed that light of this intensity is indeed sufficient to activate  
220 AU1-LOV (**Figure S3B**). We then went on to light stimulate Opto-dRET PINK1<sup>B9</sup> flies during  
221 late pupal stages and adult states (**Figure 3A**) (these stages coincide with the onset of  
222 degeneration (64, 68)). Strikingly, we observed phenotype suppression in Opto-dRET  
223 PINK1<sup>B9</sup> flies resulting in only 16% of flies with defects (**Figure 3B**). This result indicates  
224 marked improvement in tissue integrity and was comparable to the improvement observed  
225 previously upon PINK1 overexpression in the PINK1<sup>B9</sup> model (Park et al, 2006). We also  
226 tested if illumination restored the climbing deficits that accompany PINK1 loss-of-function.

227 This was indeed the case with illuminated Opto-dRET flies reaching climbing pass rates  
228 similar to those of WT flies (**Figure 3C**).

229 Mitochondrial dysfunction is a major pathological alteration observed in sporadic and  
230 familial PD and also the primary cellular consequence of loss of PINK1. We therefore tested  
231 the effect of illumination on mitochondrial function and integrity in Opto-dRET PINK1<sup>B9</sup> flies.  
232 PINK1<sup>B9</sup> flies exhibited reduced muscle ATP levels and these levels could be restored by  
233 Opto-dRET and light stimulation (**Figure 4A**). To examine mitochondrial integrity, we  
234 conducted ultrastructure analysis using transmission electron microscopy (TEM). PINK1<sup>B9</sup>  
235 muscles exhibited broadening of the myofibril Z-line and enlarged mitochondria with  
236 fragmented cristae (compare **Figure 4B** and **C**). Illumination of Opto-dRET PINK1<sup>B9</sup> flies was  
237 clearly beneficial with a reduced fraction of impaired mitochondria and an increased fraction  
238 of mitochondria with WT-like cristae structure (compare **Figure 4D** and **E**) that approached  
239 levels of control flies (**Figure 4F**). Overall, these results on the cell- and tissue-level  
240 demonstrate optogenetic suppression of consequences of PINK1 loss-of-function in a  
241 *Drosophila* model. In these experiments, we took advantage of temporally precise light  
242 stimulation to prevent undesired side effects of continuous growth signal delivery, specifically  
243 lethality associated with dRET overactivation in muscle at early developmental stages (69).

244

#### 245 *Amelioration of mitochondrial defects in PINK1-deficient human cells*

246 Finally, we tested if light activation of RET signaling can revert defects induced by loss of  
247 PINK1 in human cells. We performed these experiments in dopaminergic neuroblastoma SH-  
248 SY5Y cells that have been previously applied to study how mutations observed in PD,  
249 including those in the *PINK1* gene (70), impact mitochondrial integrity. We transfected the  
250 cells with either control siRNA or *PINK1* siRNA as well as expression vectors for Opto-dRET,  
251 Opto-dRET<sup>MEN2B</sup> or an inactive 'kinase-dead' (KD) Opto-dRET (Opto-dRET<sup>KD</sup>). Western blot  
252 (WB) analysis revealed efficient downregulation of PINK1 levels (**Figure 5A**) and that  
253 expression levels of the Opto-dRET variants were comparable (**Figure 5B**). Silencing of the  
254 *PINK1* gene resulted in severe mitochondrial defects with ~65% of cells exhibiting

255 fragmented mitochondria (**Figure 5C**, rows 1 and 2, **Figure 5D**, bars 1 and 2). As shown  
256 previously, mitochondrial integrity was restored in this model through endogenous RET  
257 stimulated with GDNF/GFR $\alpha$ 1 for 4 h (69, 71). In this paradigm, the fraction of cells with  
258 fragmented mitochondria was reduced to 20%, which is comparable to cells treated with  
259 control siRNA (**Figure 5C**, rows 1 and 3, **Figure 5D**, bars 1 and 3). We then analyzed Opto-  
260 dRET<sup>MEN2B</sup> and Opto-dRET cells and found that either expression of Opto-dRET<sup>MEN2B</sup> or light  
261 stimulation of Opto-dRET cells ( $I = 232 \mu\text{W}/\text{cm}^2$ ,  $\lambda = 470 \text{ nm}$ , 4 h) rescued mitochondria with  
262 similar efficiency (~25% of cells displaying fragmentation; **Figure 5C**, rows 4 to 6, **Figure 5D**,  
263 bars 4 to 6). Similarly to the *Drosophila* experiments, no rescue was observed upon Opto-  
264 dRET expression in dark conditions, indicating limited basal receptor activity in the absence  
265 of the light stimulus (**Figure 5C**, rows 2 and 5, **Figure 5D**, bars 2 and 5). We also verified  
266 that the kinase activity of dRET is required for rescue (**Figure 5C**, rows 5 to 8, **Figure 5D**,  
267 bars 5 to 8) and that light alone did not influence mitochondrial morphology (**Figure S4**). We  
268 also tested which signaling pathways downstream of RET are involved in mediating  
269 mitochondrial integrity. Of the main pathways activated by RET, we found that reversion of  
270 mitochondrial fragmentation depended on both the PI3K and nuclear factor 'kappa-light-  
271 chain-enhancer' of activated B-cells (NF- $\kappa$ B) pathway, but not on the MAPK/ERK pathway  
272 (**Figure 5E**). This result is in agreement with previous studies showing that the protein  
273 network regulated by GFL/RET overlaps with that involved in PINK1 function (69, 71).  
274 Collectively, these findings show that beneficial trophic signals can be delivered to a human  
275 cellular model of PD using optogenetics.

276

## 277 **Discussion**

278 Choreographed signaling of GFs and their cognate RTKs underlies tissue morphogenesis  
279 and homeostasis, whereas their aberrant activity is linked to human disorders. For instance,  
280 in the case of RET, gain-of-function is implicated in several forms of cancer and loss-of-  
281 function is linked to developmental disorders and neurodegeneration (72, 73). Motivated by  
282 the importance of RET, we engineered human and *Drosophila* RET receptors that can be

283 activated by light. Recent work has demonstrated light activation of RTKs generally following  
284 seminal designs that built on either dimerizing (14) or oligomerizing (15) photoreceptor  
285 domains. We developed Opto-hRET and Opto-dRET using the homodimerizing AU1-LOV  
286 domain, and whilst LOV domains have enabled dimerization of isolated kinase domains in  
287 the past, we here show that this approach is suited for activation of full-length RET receptors.  
288 This suggests that enforced association at the RET C-terminus can overcome autoinhibition  
289 by elements of the extracellular domain that can counteract ligand-independent dimerization.  
290 These light-activated human and *Drosophila* RTKs add to an optogenetic arsenal that  
291 already consists of light-activated enzymes and optically-recruited signaling proteins, some  
292 of which have already permitted the optogenetic control of cell behavior in *Drosophila* (1, 2).

293 In the first experiment, we applied Opto-dRET in the *Drosophila* retina to interfere with  
294 tissue morphogenesis. Retina development depends on concerted cell proliferation and  
295 differentiation events, and RTKs play a key role in ommatidia formation and ommatidial  
296 lattice generation. We observed retina malformations specifically in flies that were illuminated  
297 during tissue formation stages, in agreement with earlier observations that downstream  
298 pathways are not operating at maximal levels during retina development because of multiple  
299 and reiterative uses of RTKs (54, 55, 74). This experiment complements recent optogenetic  
300 studies in *Drosophila* tissues other than the retina that have incorporated spatio-temporal  
301 regulation to identify tissues and stages with high sensitivity to ectopic signals (75-78).

302 We then explored if optogenetics can suppress phenotypes in a genetic model of PD.  
303 Previous optogenetic studies in the context of neurological and neurodegenerative disorders  
304 focused on understanding or correcting aberrant electrical activity in excitable cells (7, 8),  
305 whilst our goal was the delivery of trophic effects through the optical control of biochemical  
306 pro-survival pathways. Our model was *Drosophila* with loss of PINK1, a Ser/Thr kinase that  
307 causes autosomal recessive PD (33-35). Although evidently not able to recapitulate all  
308 features of human PD, we chose *Drosophila* as the model because PINK1 loss-of-function  
309 manifests in robust phenotypes that have previously helped to delineate pathways implicated  
310 in mitochondrial physiology and in PD pathogenesis (61, 64, 68, 79-86). Cell degeneration in

311 this model occurs most strongly in cells outside of the nervous system, such as in IFMs,  
312 likely because of their high energy demand. Activation of Opto-dRET resulted in efficient  
313 suppression of mitochondrial alterations, tissue degeneration and attendant locomotion  
314 fitness. We also demonstrated rescue of mitochondrial morphology in PINK1-deficient human  
315 cells, and this second model allowed us to identify signaling pathways downstream of dRET  
316 that are essential for reversion of the defects. PI3K and NF- $\kappa$ B activity were required to  
317 reestablish the healthy mitochondrial network. These pathways are known to act as an  
318 important node of crosstalk downstream of tyrosine kinases (87-89), and their involvement is  
319 in line with previous observations that the protein networks regulated by GFL/RET overlap  
320 with those altered in PD (69, 71). We noted that PINK1 deficiency phenotypes in flies and  
321 human cells were only modified by Opto-dRET upon stimulation with light but not in the dark,  
322 indicating little background activity of the receptor in the absence of activation of the  
323 introduced optical switch. It will be interesting to determine in future studies whether Opto-  
324 dRET is efficacious in ameliorating phenotypes in mammalian *in vivo* models of PD.

325         The new ability to remotely and spatio-temporally control cellular events relevant to  
326 human disease has previously inspired the pursuit of optogenetics-based treatment  
327 strategies (see above); but what makes optogenetics an attractive method for pro-survival  
328 signal delivery, in general or in the context of PD models? The protection or regeneration of  
329 cells is a key target in the treatment of a variety of disorders, but the practical application of  
330 GFs is challenging. Many GF receptors have widespread tissue distribution and thus  
331 systemic growth factor administration may result in off-target effects, such as toxicity or  
332 undesired proliferation, in cells other than those targeted (90, 91). Furthermore, many GFs  
333 exhibit limited half-life in the circulation or do not reach target tissues (92, 93). Additionally,  
334 GF gene therapy results in permanent hyperactivation of signaling pathways that can be  
335 linked to side effects and potential safety issues (94). In PD specifically it is not clear if the  
336 cellular signaling machinery of degenerating DA neurons can respond to GFLs, e.g. because  
337 of impaired RTK retrograde trafficking or expression (23, 95). Optogenetics has properties  
338 that may address some of these challenges. For instance, optogenetic control can be

339 reversible and limited to specific cell populations. In addition, optogenetic receptors do not  
340 rely on ligand binding in neuronal projections. It has been recently demonstrated that RET  
341 downregulation in a mouse model of PD can be compensated by a virally delivered of RET  
342 (96). This finding provides an encouraging basis for further exploration of Opto-RETs in  
343 mammalian models of PD. Translation of optogenetics into the brain may be facilitated by  
344 innovations that are currently pursued by many groups, such as wirelessly-powered  
345 microscale electronics that are implantable and biocompatible, or transcranial energy  
346 delivery. In this study, we demonstrated in a genetic model of PD that ligand-independent  
347 optical delivery of trophic signals is in principle possible, paving the way for future studies in  
348 animal models of PD and potentially also other disorders linked to the GF-RTK axis.

349 **Author contributions (CRediT taxonomy)**

350 Conceptualization, A.I.P., D.S., P.S., K.W. and H.J.; Funding Acquisition, D.S., P.S., K.W.  
351 and H.J.; Methodology, A.I.P., P.S., K.W. and H.J.; Project Administration, H.J.;  
352 Investigation, A.I.P., N.F., N.H., M.P., E.R. and V.Z.; Data curation, A.I.P., N.F., S.C., N.H.,  
353 M.P.; Resources, A.G. and J.B.; Supervision, D.S., P.S., K.W. and H.J.; Writing - Original  
354 Draft, A.I.P. and H.J.; Writing - Review and Editing, D.S., P.S., K.W. and H.J.

355

356

357 **Acknowledgements**

358 We thank R. Cagan, A. Whitworth and J. Nagpal for fly lines and advice, S. Herlitz for  
359 provision of a tissue culture illuminator, and Verian Bader for help with statistical analysis.  
360 Stocks obtained from the Bloomington *Drosophila* Stock Center (NIH P40OD018537) were  
361 used in this study. This work depended on information provided by FlyBase. The research  
362 leading to these results has received funding from the People Programme (Marie Curie  
363 Actions) of the European Union's Seventh Framework Programme (FP7/2007-2013) under  
364 REA grant agreements 303564 and 334077 (to HJ and DS), from the German Research  
365 Foundation (DFG; Research Unit 2848 to KFW; SO1379/4-1 and SO1379/2-1/2-2 to PS),  
366 and from the German Academic Exchange Service in The Australia–Germany Joint  
367 Research Cooperation Scheme (DAAD, Project ID 57446392, to KFW). A.I.P. was supported  
368 by a Ramón Areces post-doctoral fellowship. The Australian Regenerative Medicine Institute  
369 is supported by grants from the State Government of Victoria and the Australian  
370 Government. The EMBL Australia Partnership Laboratory (EMBL Australia) is supported by  
371 the National Collaborative Research Infrastructure Strategy (NCRIS) of the Australian  
372 Government.

## 373 **Materials and Methods**

374

375 **Engineering light-activated RET receptors.** The gene encoding full-length dRET with the  
376 MEN2B M955T substitution ( $dRET^{MEN2B}$ , a kind gift of Ross Cagan, Icahn School of Medicine  
377 at Mount Sinai, NY) was amplified from an expression vector by PCR and inserted into  
378 pUAST. To obtain *Opto-dRET*<sup>MEN2B</sup> in pUAST, *AU1-LOV* (14) was inserted at the far C-  
379 terminus of the receptor. To obtain *Opto-dRET* in pUAST, the M955T substitution of  
380  $dRET^{MEN2B}$  was reverted using site-directed mutagenesis. To express Opto-dRET in  
381 mammalian cells, the gene was amplified by PCR and sub-cloned into pcDNA3.1(-) including  
382 a hemagglutinin (HA)-epitope. To obtain *Opto-dRET*<sup>MEN2B</sup> in pcDNA3.1(-), the M955T  
383 substitution was introduced using site-directed mutagenesis. To obtain the KD variant, the  
384 K805M substitution was introduced using site-directed mutagenesis. To express Opto-hRET  
385 in mammalian cells, the full-length receptor was inserted into a pcDNA3.1(-) vector  
386 containing *AU1-LOV* (14). All constructs were verified by DNA sequencing. Sequences of the  
387 receptors are given in **Tables S1** and **S2**.

388

389 **Cell culture, transfection and MAPK/ERK pathway activation (HEK293).** The MAPK/ERK  
390 pathway was assayed in HEK293 cells with the Elk1 *trans*-reporting system (PathDetect,  
391 Agilent). HEK293 cells were maintained in DMEM supplemented with 10% FBS, 100 U/ml  
392 penicillin and 0.1 mg/ml streptomycin in a humidified incubator (37°C, 5% CO<sub>2</sub>). 50'000 cells  
393 were seeded in each well of white clear bottom 96-well plates (triplicates for each construct)  
394 coated with poly-L-ornithine (Sigma). Cells were reverse transfected with 3 to 25 ng receptor  
395 vector and ~200 ng combined reporter vectors per well using polyethylenimine  
396 (Polysciences). Six h after transfection, medium was replaced with CO<sub>2</sub>-independent reduced  
397 serum starve medium (Gibco/Life Technologies; supplemented with 0.5% FBS, 2 mM L-  
398 Glutamine, 100 U/ml penicillin and 0.1 mg/ml streptomycin). Cells were then either  
399 illuminated with blue light in a custom incubator (PT2499, ExoTerra) for 8 h or protected from  
400 light with foil as described previously (97). After incubation, plates were processed with a



401 luciferase assay (One-Glo, Promega) and luminescence was detected in a microplate reader  
402 (Synergy H1, BioTek). Low-light stimulation (**Figure S3B**) was performed as previously  
403 described (47) using a light blocking sample with an optical density of 1 and an external light  
404 intensity of  $15 \mu\text{W}/\text{cm}^2$  (resulting in a final intensity of  $1.5 \mu\text{W}/\text{cm}^2$ ).

405

406 **Cell culture, RNA interference, transfection and treatments (SH-SY5Y cells).** SH-SY5Y  
407 cells (DSMZ ACC 209) were maintained in DEMEM/F-12 (1:1) supplemented with 15% FBS  
408 (Sigma), 1% non-essential amino acid solution, 100 U/ml penicillin and 100  $\mu\text{g}/\text{ml}$   
409 streptomycin (Life Technologies) in a humidified incubator ( $37^\circ\text{C}$ , 5%  $\text{CO}_2$ ).  $1.5 \times 10^5$  cells  
410 were seeded in each well of a 6-well plate containing two 15 mm coverslips per well.  
411 Transient co-transfection of siRNA oligos and DNA plasmids were performed using  
412 Lipofectamine 2000 (Thermo Fisher). The following three *PINK1* siRNAs were used at a final  
413 concentration of 60 pmol/ml each: siRNA *PINK1* HSS127945/127946/185707 (Life  
414 Technologies). To identify transfected cells by fluorescence microscopy, a plasmid encoding  
415 GFP was co-transfected (0.2  $\mu\text{g}/\text{well}$ ; in total, 1.2  $\mu\text{g}/\text{well}$  were transfected). Mitochondrial  
416 morphology was analyzed 2 days after transfection as described below. For illumination of  
417 the cells, the 6-well plate was placed in a LED illumination unit inside the incubator. Cells  
418 were illuminated for 4 h at a wavelength of 470 nm and an intensity of  $232 \mu\text{W}/\text{cm}^2$ . To  
419 activate endogenous RET, cells were treated with recombinant human GDNF (Shenandoah  
420 Biotechnology) and human  $\text{GFR}\alpha 1$  (R&D Systems) for 4 h at a final concentration of 100  
421 ng/ml. Signaling pathway inhibitors were added to cells 1 h prior to illumination at the  
422 following concentrations: 50  $\mu\text{M}$  LY294002 (PI3K inhibitor, Cell Signaling) or 30  $\mu\text{M}$  PD98059  
423 (MEK1 inhibitor, Cell Signaling). The HA-IkB-2S32A/S36A plasmid (IkB-2S/A (98)) was  
424 generated by overlap extension PCR using the following primers: mut-IkB-2S-fwd  
425 CCACGACGCCGGCCTGGACGCCATGAAAG, mut-IkB-2S-rev  
426 CGTCTTTCATGGCGTCCAGGCCGGCGTCCG, BamHI-IkB2S-fwd  
427 ATATGGATCCTTCCAGGCCGGCCGAGCGCCCCCAGGAG and IkB2S-NotI-rev  
428 ATATGCGGCCGCCTATAACGTCAGACGCTGGCCTCCAAACACACAGTC. The amplified

429 fragments were digested with BamHI and NotI and cloned into the pcDNA3.1-N-HA vector.  
430 pEGFP-N3 was purchased from Clontech.

431

432 **Analysis of mitochondrial morphology (SH-SY5Y cells).** Mitochondria in SH-SY5Y cells  
433 growing on 15 mm coverslips were stained for 15 min with 25 nM MitoTracker red CMXRos  
434 (Life Technologies) diluted in cell culture media and then washed twice with medium.  
435 Mitochondrial morphology of living cells was immediately analyzed with a fluorescence  
436 microscope (Nikon Eclipse E400). Cells displaying an intact network of tubular mitochondria  
437 were classified as tubular. When this network was disrupted and mitochondria appeared  
438 either globular or rod-like, they were classified as fragmented (70). For quantification of  
439 mitochondrial morphology, five independent experiments were performed. At least 150  
440 transfected cells were analyzed per condition for each experiment.

441

442 **WB analysis (SH-SY5Y cells).** SH-SY5Y cells were analyzed two days after transient  
443 transfection for expression of Opto-dRET constructs and *PINK1* silencing efficiency. For  
444 stabilization of endogenous full-length PINK1, cells were treated with 10  $\mu$ M FCCP (Agilent)  
445 for 2 h before cell lysis. Proteins were detected by WB using a monoclonal rabbit anti-PINK1  
446 antibody (1:1000; Cell Signaling, D8G3) or an anti-HA antibody (1:1000; Covance, 16B12)  
447 for the Opto-dRET constructs. Data were normalized to monoclonal mouse anti- $\beta$ -actin  
448 staining (1:2000; Sigma, AC-74).

449

450 **Fly strains, maintenance and scoring.** Flies were raised on standard agar, cornmeal and  
451 molasses substrate supplemented with 1.5% nipagin. *GMR-GAL4* flies were a kind gift of  
452 Ross Cagan. *PINK1<sup>B9</sup>/FM6*; *MEF2-GAL4* flies were a gift of Alex Whitworth (University of  
453 Cambridge, UK). Transgenic flies expressing Opto-dRET and Opto-dRET<sup>MEN2B</sup> were  
454 generated by injection of pUAST receptor constructs (BestGene). For selection, balanced fly  
455 lines (~12 transformants/line) were crossed with *GMR-GAL4* flies. Approximately 10 days  
456 after crossing, descendants were visually inspected for the presence of a rough retina

457 phenotype. Rough retina and hollow thorax phenotypes were scored on a dissecting  
458 microscope equipped with a digital camera (M205FA and DFC3000G, Leica Microsystems).  
459 Genotypes of fly lines utilized in this study are summarized in **Table S3**.

460

461 **Light stimulation of flies.** Flies were illuminated inside their vials in the custom LED  
462 incubator (**Figure S3A**) set to the temperature and light intensities indicated in the text and  
463 figures. Vials containing control flies were wrapped with foil and placed in the same  
464 incubator. Light incubators were placed in a controlled environment to maintain humidity at  
465 65%. Experiments with GAL4 drivers were conducted at 29°C to increase receptor  
466 expression.

467

468 **Scanning electron microscopy.** Adult flies were anaesthetized with CO<sub>2</sub>, placed in 25%  
469 ethanol for 24 h at room temperature (RT) and dehydrated in a graded ethanol series for 3  
470 days. Samples were dried from 100% ethanol with a critical point dryer (EM-CPD300, Leica  
471 Microsystems), gold-coated using a sputter coater (EM-ACE600, Leica Microsystems) and  
472 imaged at a magnification of 152X (FE-SEM Merlin compact VP, Carl Zeiss; operated at 3  
473 kV).

474

475 **Quantification of rough retina phenotype.** Three analysis methods were applied to retinas.  
476 Fused retinal area was defined as the ratio of the total retina area divided by the total  
477 disrupted area. The disrupted area was defined as a region containing two or more fused  
478 ommatidia. The number of distinct structures was determined using a distortion algorithm  
479 (99). The output of the algorithm is mapping of boundaries surrounding single or fused  
480 ommatidia that are the structures of interest. Structure count and structure centers were then  
481 identified in Fiji. Regularity was determined based on structure centers and their nearest  
482 neighbor distance distributions using macros written in Igor Pro (Wavemetrics). Regularity  
483 was defined as the ratio of the mean nearest neighbor distance and its SD for each image  
484 (59).

485

486 **Transmission electron microscopy.** Thoraces were fixed in 2.5% glutaraldehyde and 2%  
487 paraformaldehyde in 0.1 M phosphate buffer (pH 7.4) for 2 h at RT. Samples were post-fixed  
488 and contrast enhanced with 1% osmium tetroxide in phosphate buffer for 1.5 h and 1%  
489 uranyl acetate in 50% ethanol/water for 45 min. Samples were then dehydrated in a graded  
490 ethanol series and embedded in Durcupan (Sigma-Aldrich). Ultrathin sections (70 nm) were  
491 sliced using a microtome (EM UC7 Ultramicrotome, Leica Microsystems) and mounted on  
492 formvar coated copper slot grids. Images were acquired at a magnification of 9000X (Tecnai  
493 10, FEI/Thermo Fisher Scientific; operated at 80 kV, equipped with OSIS Megaview III  
494 camera). The electron dense fraction of the cytoplasm (mitochondria) was determined by  
495 manual selection, application of threshold and the area fraction command in Fiji.

496

497 **ATP determination.** Thoraces from two-day old flies were homogenized in 50  $\mu$ l of  
498 extraction buffer (100 mM Tris-HCl, 4 mM EDTA, pH 7.8) supplemented with 6 M Guanidine-  
499 HCl using a pellet homogenizer (47747-370, VWR international). The lysate was boiled for 3  
500 min and cleared by centrifugation at 20'000 g for 5 min. The samples were diluted 1:100 in  
501 extraction buffer before quantification using a luciferase-based ATP kit (A22066, Thermo  
502 Fisher Scientific). Values were expressed relative to total protein concentration measured by  
503 using a BCA assay (Pierce). Luminescence and absorbance at 562 nm were measured  
504 using the microplate reader. ATP levels were normalized to those of *Opto-dRET* female flies.

505

506 **Negative geotaxis (climbing) assay.** Male flies of the indicated genotype have been  
507 exposed to blue light ( $I = 320 \mu\text{W}/\text{cm}^2$ ,  $\lambda = 470 \text{ nm}$ ) or kept in the dark during the indicated  
508 developmental time points. For each experiment, males hatching on the same day were  
509 pooled. Adults were aged for 2-3 days on standard fly food. On day 3, flies were  
510 anaesthetized briefly with  $\text{CO}_2$  and 10 flies each were placed in an acrylic glass tube of 30  
511 cm length closed with a flyplug (Carl Roth PK13.1). Flies were allowed to recover and adapt  
512 for 1 h. Negative geotaxis climbing performance was then assayed as previously described

513 (100). Flies were tapped down and the number of flies reaching the 15 cm mark within 15 s  
514 was recorded. 10 technical repeats (1 min break between repeats) were performed for each  
515 genotype to obtain an average climbing score (defined as fly count above the 15 cm line /  
516 total fly count). For each genotype and condition, at least 5 independent experiments were  
517 performed.

518

519 **Statistical analysis.** HEK293 cell assays were performed in triplicate wells and in at least  
520 three independent experiments. Statistical analysis was performed using unpaired, two-tailed  
521 t-tests for comparison of dark and light conditions.

522 Fly assays were performed in at least three independent experiments with the  
523 number of flies indicated in the figures. Statistical analysis of numerical outcomes was  
524 performed using one-way analysis of variance (ANOVA) followed by Bonferroni corrected  
525 multiple t-test comparisons. For categorical outcomes (thorax defect and climbing pass),  
526 SEMs shown in the figure derived from binomial distributions. Statistical significance was  
527 tested using Fisher's exact tests. Climbing experiments were performed in 10 repeats for  
528 each animal group consisting of 10 animals. Statistical significance is indicated using the  
529 'compact letter display'.

530 SH-SY5Y cell fragmentation assays were performed in five independent experiments  
531 with at least 150 cells per condition in each experiment. Statistical analysis was performed  
532 using one-way analysis of variance (ANOVA) followed by followed by Bonferroni corrected  
533 multiple t-test comparisons. Statistical significance is indicated using 'compact letter display'.

534 **Figures**

535

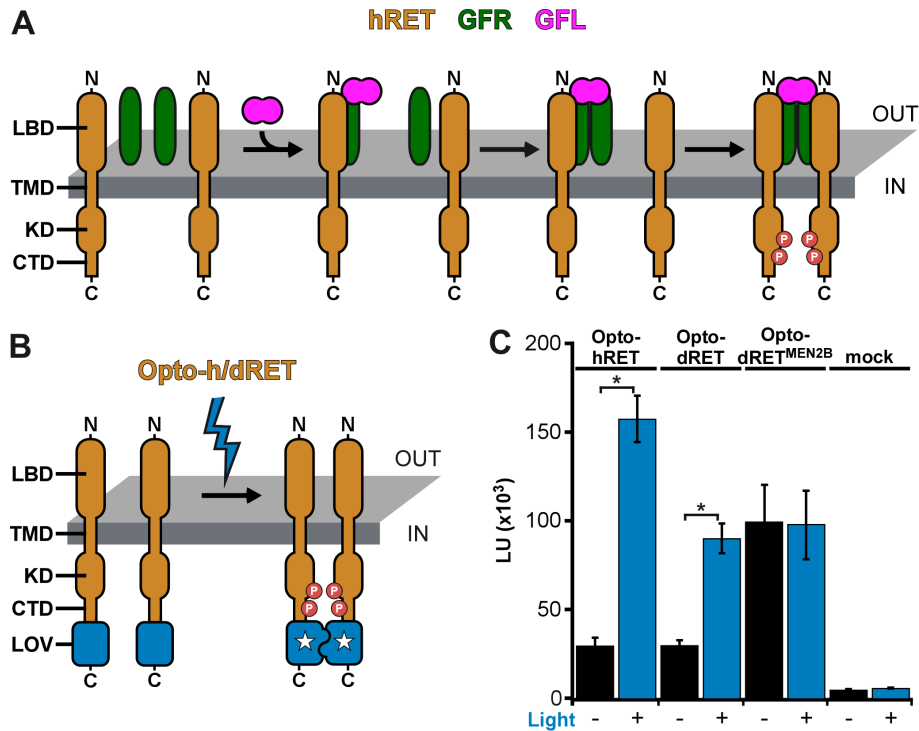

536

537

538 **Figure 1. Engineering of light-activated RET receptors.** (A) hRET and dRET consist of an  
 539 extracellular ligand-binding domain (LBD), single-span transmembrane domain (TMD) and  
 540 intracellular domain (KD: kinase domain, CTD: C-terminal tail domain). Activation by GFL  
 541 and GFR $\alpha$  was shown to result in the formation of a human ternary complex (binding model  
 542 of Schlee *et al.* (39)). (B) In light-activated Opto-h/dRET, the LOV domain of the  
 543 AUREOCHROME1 photoreceptor of *V. frigida* is incorporated at the receptor C-terminus. (C)  
 544 MAPK/ERK pathway activation in response to blue light ( $I = 250 \mu\text{W}/\text{cm}^2$ ,  $\lambda = 470 \text{ nm}$ ) for  
 545 HEK293 cells transfected with *Opto-hRET*, *Opto-dRET* or *Opto-dRET*<sup>MEN2B</sup>. Light units (LU;  
 546 mean  $\pm$  SD) for dark treated cells and illuminated cells are given ( $n = 9$  to 18, three  
 547 independent experiments, t-test, \*:  $p < .0001$ ).

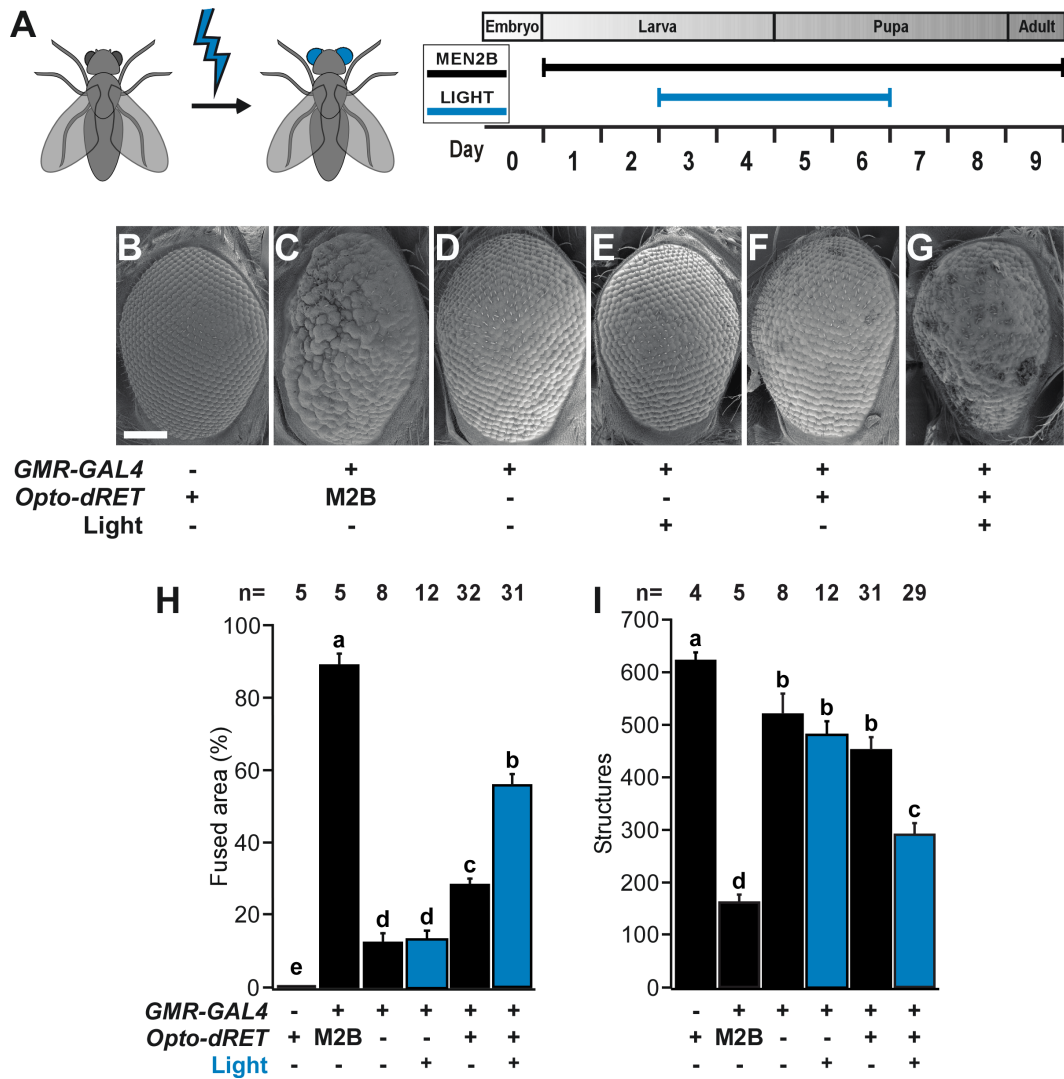

548

549

550 **Figure 2. Induction of retina roughening and phenotype quantification. (A)**

551 Developmental time window targeted by light in retina experiments. **(B-G)** Representative

552 retina SEM images. Scale bar: 0.1 mm. **(H and I)** Quantification of rough retina phenotypes

553 of one-day old flies as fused area and the number of structures identified. “M2B” denotes

554  $Opto-dRET^{MEN2B}$ . For H and I, mean  $\pm$  SD for the indicated number of flies is given (at least

555 three independent experiments). Means sharing the same label are not significantly different

556 (ANOVA/Bonferroni corrected t-tests,  $p > .04$ ). Light intensity was  $385 \mu W/cm^2$ .

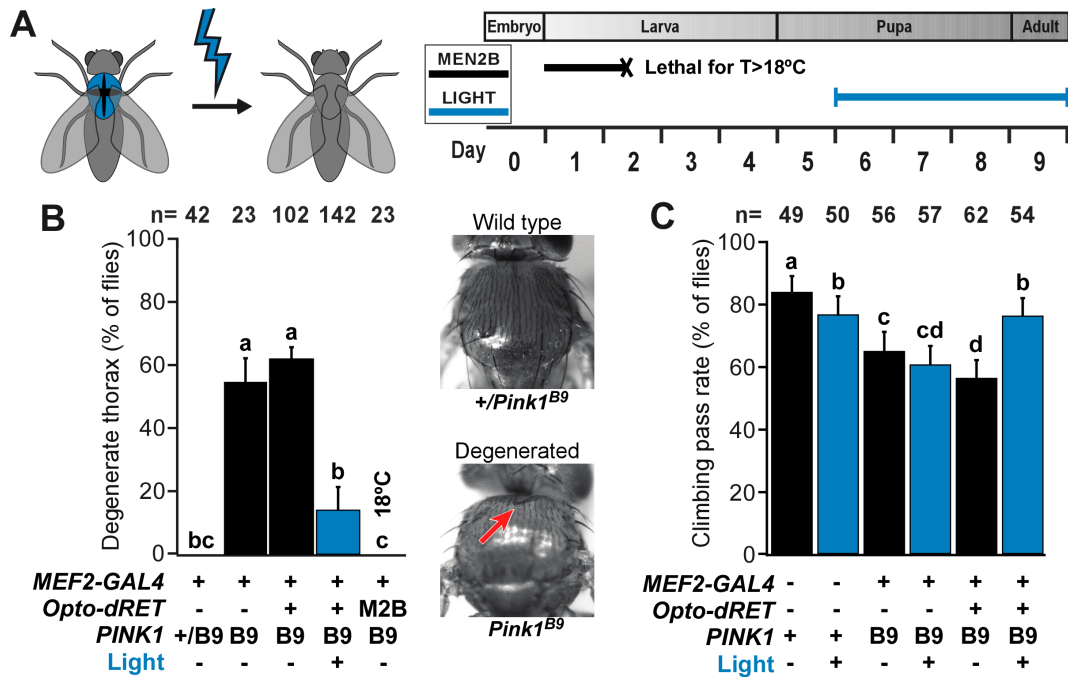

557

558

559 **Figure 3. Suppression of thorax defects and locomotion deficits.** (A) Time window  
 560 targeted by light in experiments with *PINK1*<sup>B9</sup> flies. Illumination of pupal and adult stages  
 561 prevented lethality observed upon Opto-dRET signaling in earlier stages (e.g., Opto-  
 562 dRET<sup>MEN2B</sup> flies were grown at 18°C to prevent lethality during development; see Main Text).  
 563 (B) Percentage of two-day old flies with a degenerate thorax phenotype. Representative  
 564 bright field thorax images shown on the right. Hollow thorax is highlighted by the red arrow.  
 565 (C) Climbing ability of flies. “M2B” denotes Opto-dRET<sup>MEN2B</sup>. *PINK1* “+” denotes the WT  
 566 gene. For B and C, counts ± SE for the indicated number of flies (n) is given (see Materials  
 567 and Methods for repetitions in climbing assays). Means sharing the same label are not  
 568 significantly different (Fisher’s exact test, p>.04). Light intensity was 320 μW/cm<sup>2</sup>.



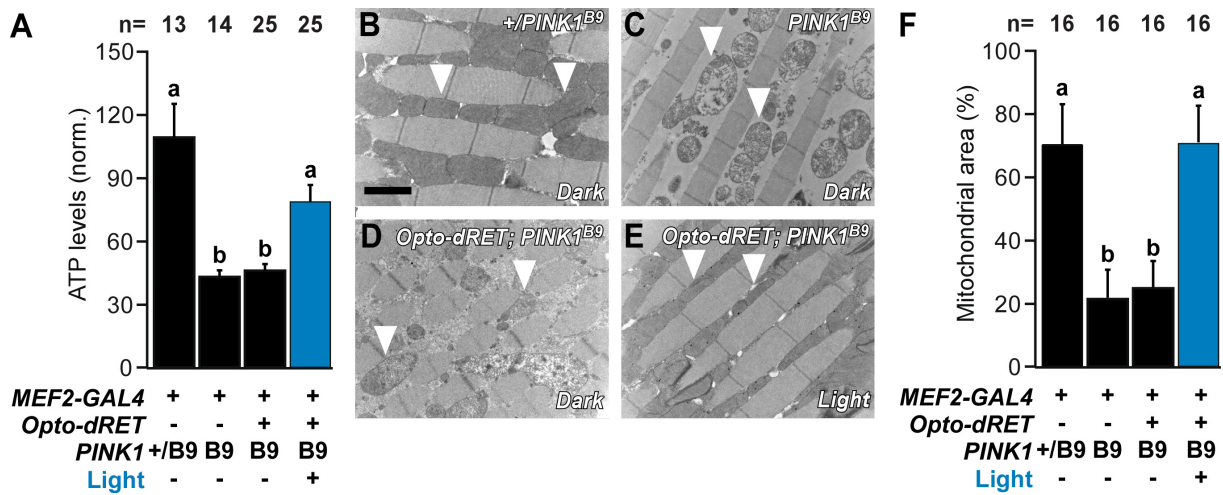

569

570

571 **Figure 4. Improved mitochondrial structure and function.** (A) ATP content in fly thoraces  
 572 from PINK1<sup>B9</sup> flies at the indicated conditions. (B-E) Representative TEM images of thoracic  
 573 indirect flight muscles. Arrow heads indicate mitochondria that are either electron dense (B:  
 574 controls, E: illuminated PINK1<sup>B9</sup> Opto-dRET flies) or malformed with disintegrated cristae (C:  
 575 PINK1<sup>B9</sup> flies, D: PINK1<sup>B9</sup> Opto-dRET flies in the absence of light). Scale bar: 2  $\mu$ m. (F)  
 576 Analysis of mitochondrial density in TEM images. “M2B” denotes Opto-dRET<sup>MEN2B</sup>. PINK1 “+”  
 577 denotes the WT gene. For A, mean  $\pm$  SD for the indicated number of flies is given (at least  
 578 three independent experiments). For F, mean  $\pm$  SD for the indicated number of micrographs  
 579 is given (at least three independent experiments). Means sharing the same label are not  
 580 significantly different (ANOVA/Bonferroni corrected t-tests,  $p > .04$ ). Light intensity was 320  
 581  $\mu$ W/cm<sup>2</sup>.

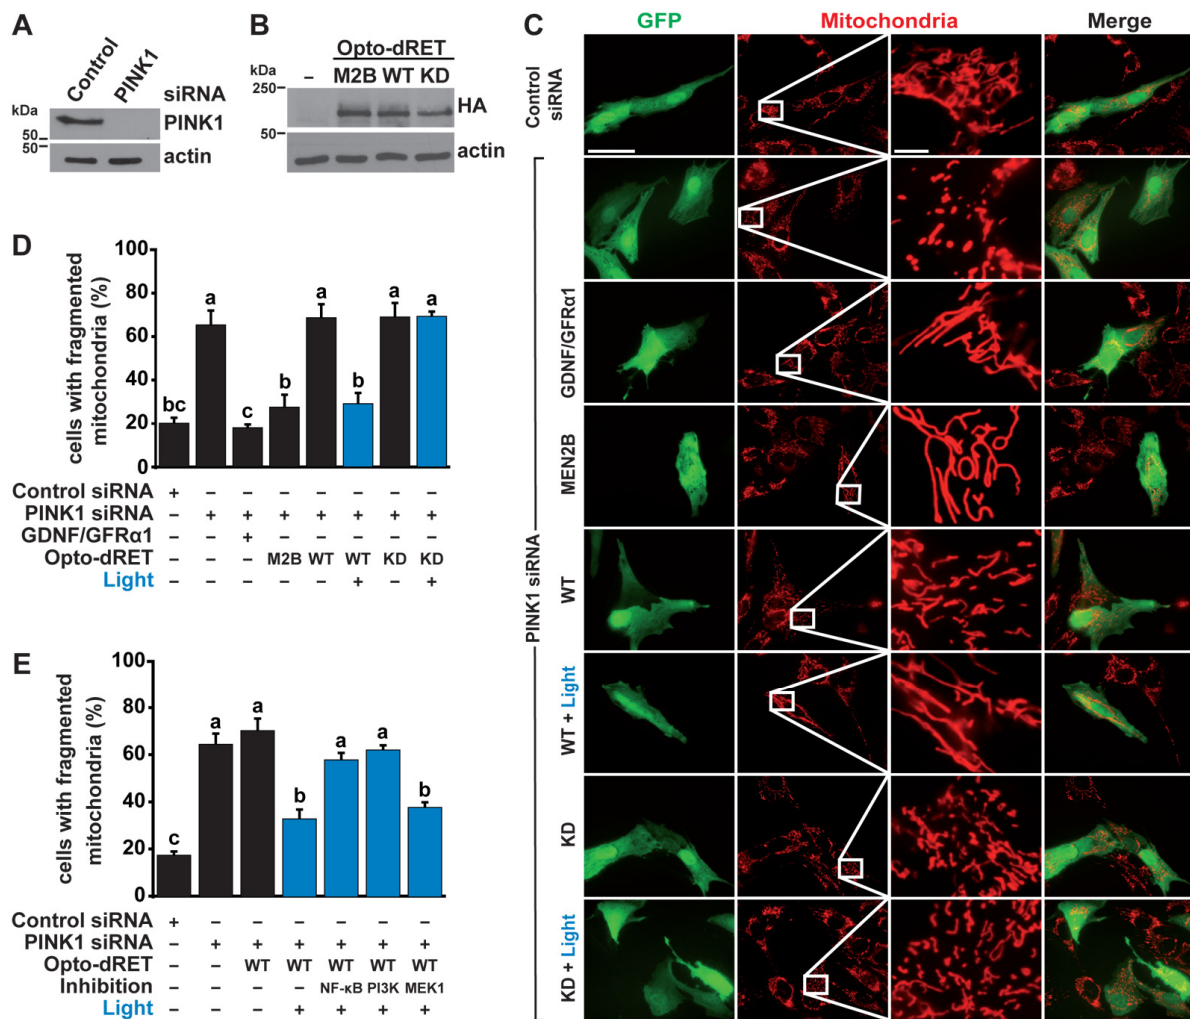

582

583

584 **Figure 5. Rescue of mitochondrial fragmentation in human cells.** (A and B) WB analysis  
 585 of *PINK1* knock-down by siRNA and Opto-dRET expression. (C) Representative images for  
 586 fragmentation of mitochondria induced by *PINK1* silencing. Red: MitoTracker. Green: GFP  
 587 marker. Scale bar: 200 (column 1, 2) or 20  $\mu$ m (columns 3, 4). (D) Quantification of  
 588 mitochondrial fragmentation upon stimulation of RET, Opto-dRET, Opto-dRET<sup>MEN2B</sup> or Opto-  
 589 dRET<sup>KD</sup>. (E) Quantification analysis of mitochondrial fragmentation upon light activation of  
 590 Opto-dRET and inhibition of NF- $\kappa$ B signaling (by I $\kappa$ B-2S/A), PI3K (by LY294002) or MEK1 (by  
 591 PD98059). For D and E, mean  $\pm$  SD for five independent experiments is given (at least 150  
 592 cells per condition in each experiment). Means sharing the same label are not significantly  
 593 different (ANOVA/Bonferroni corrected t-tests,  $p > .04$ ).

594 **References**

- 595 1. H. E. Johnson, J. E. Toettcher, Illuminating developmental biology with cellular  
596 optogenetics. *Curr Opin Biotechnol* **52**, 42-48 (2018).
- 597 2. G. Guglielmi, H. J. Falk, S. De Renzis, Optogenetic control of protein function: From  
598 intracellular processes to tissue morphogenesis. *Trends Cell Biol* **26**, 864-874 (2016).
- 599 3. K. Deisseroth, Optogenetics: 10 years of microbial opsins in neuroscience. *Nat*  
600 *Neurosci* **18**, 1213-1225 (2015).
- 601 4. L. J. Bugaj *et al.*, Cancer mutations and targeted drugs can disrupt dynamic signal  
602 encoding by the Ras-Erk pathway. *Science* **361** (2018).
- 603 5. M. Z. Wilson, P. T. Ravindran, W. A. Lim, J. E. Toettcher, Tracing information flow  
604 from erk to target gene induction reveals mechanisms of dynamic and combinatorial  
605 control. *Mol Cell* **67**, 757-769 e755 (2017).
- 606 6. V. Agus, H. Janovjak, Optogenetic methods in drug screening: technologies and  
607 applications. *Curr Opin Biotechnol* **48**, 8-14 (2017).
- 608 7. J. D. Ordaz, W. Wu, X. M. Xu, Optogenetics and its application in neural degeneration  
609 and regeneration. *Neural Regen Res* **12**, 1197-1209 (2017).
- 610 8. K. M. Tye, K. Deisseroth, Optogenetic investigation of neural circuits underlying brain  
611 disease in animal models. *Nat Rev Neurosci* **13**, 251-266 (2012).
- 612 9. V. Gradinaru, M. Mogri, K. R. Thompson, J. M. Henderson, K. Deisseroth, Optical  
613 deconstruction of parkinsonian neural circuitry. *Science* **324**, 354-359 (2009).
- 614 10. J. A. Steinbeck *et al.*, Optogenetics enables functional analysis of human embryonic  
615 stem cell-derived grafts in a Parkinson's disease model. *Nat Biotechnol* **33**, 204-209  
616 (2015).
- 617 11. V. Busskamp *et al.*, Genetic reactivation of cone photoreceptors restores visual  
618 responses in retinitis pigmentosa. *Science* **329**, 413-417 (2010).
- 619 12. J. B. Bryson *et al.*, Optical control of muscle function by transplantation of stem cell-  
620 derived motor neurons in mice. *Science* **344**, 94-97 (2014).
- 621 13. T. Bruegmann *et al.*, Optogenetic control of heart muscle in vitro and in vivo. *Nat*  
622 *Methods* **7**, 897-900 (2010).
- 623 14. M. Grusch *et al.*, Spatio-temporally precise activation of engineered receptor tyrosine  
624 kinases by light. *EMBO J* **33**, 1713-1726 (2014).
- 625 15. N. Kim *et al.*, Spatiotemporal control of fibroblast growth factor receptor signals by  
626 blue light. *Chem Biol* **21**, 903-912 (2014).
- 627 16. V. V. Krishnamurthy *et al.*, Reversible optogenetic control of kinase activity during  
628 differentiation and embryonic development. *Development* **143**, 4085-4094 (2016).
- 629 17. P. Huang *et al.*, Optical Activation of TrkB Signaling. *J Mol Biol* **432**, 3761-3770  
630 (2020).
- 631 18. N. Bunnag *et al.*, An optogenetic method to study signal transduction in intestinal  
632 stem cell homeostasis. *J Mol Biol* **432**, 3159-3176 (2020).

- 633 19. M. Takahashi, J. Ritz, G. M. Cooper, Activation of a novel human transforming gene,  
634 ret, by DNA rearrangement. *Cell* **42**, 581-588 (1985).
- 635 20. A. Bjorklund *et al.*, Towards a neuroprotective gene therapy for Parkinson's disease:  
636 use of adenovirus, AAV and lentivirus vectors for gene transfer of GDNF to the  
637 nigrostriatal system in the rat Parkinson model. *Brain Res* **886**, 82-98 (2000).
- 638 21. C. W. Olanow, R. T. Bartus, L. A. Volpicelli-Daley, J. H. Kordower, Trophic factors for  
639 Parkinson's disease: To live or let die. *Movement disorders : official journal of the*  
640 *Movement Disorder Society* **30**, 1715-1724 (2015).
- 641 22. C. Warren Olanow *et al.*, Gene delivery of neurturin to putamen and substantia nigra  
642 in Parkinson disease: A double-blind, randomized, controlled trial. *Annals of*  
643 *neurology* **78**, 248-257 (2015).
- 644 23. W. J. Marks, Jr. *et al.*, Gene delivery of AAV2-neurturin for Parkinson's disease: a  
645 double-blind, randomised, controlled trial. *Lancet Neurol* **9**, 1164-1172 (2010).
- 646 24. F. P. Manfredsson *et al.*, Nigrostriatal rAAV-mediated GDNF overexpression induces  
647 robust weight loss in a rat model of age-related obesity. *Mol Ther* **17**, 980-991 (2009).
- 648 25. B. Georgievska, D. Kirik, A. Bjorklund, Aberrant sprouting and downregulation of  
649 tyrosine hydroxylase in lesioned nigrostriatal dopamine neurons induced by long-  
650 lasting overexpression of glial cell line derived neurotrophic factor in the striatum by  
651 lentiviral gene transfer. *Exp Neurol* **177**, 461-474 (2002).
- 652 26. D. Kirik, C. Rosenblad, A. Bjorklund, R. J. Mandel, Long-term rAAV-mediated gene  
653 transfer of GDNF in the rat Parkinson's model: intrastriatal but not intranigral  
654 transduction promotes functional regeneration in the lesioned nigrostriatal system. *J*  
655 *Neurosci* **20**, 4686-4700 (2000).
- 656 27. P. Barroso-Chinea *et al.*, Long-term controlled GDNF over-expression reduces  
657 dopamine transporter activity without affecting tyrosine hydroxylase expression in the  
658 rat mesostriatal system. *Neurobiology of disease* **88**, 44-54 (2016).
- 659 28. L. Tenenbaum, M. Humbert-Claude, Glial cell line-derived neurotrophic factor gene  
660 delivery in Parkinson's disease: A delicate balance between neuroprotection, trophic  
661 effects, and unwanted compensatory mechanisms. *Front Neuroanat* **11**, 29 (2017).
- 662 29. T. M. Axelsen, D. P. D. Woldbye, Gene therapy for Parkinson's disease, an update. *J*  
663 *Parkinsons Dis* **8**, 195-215 (2018).
- 664 30. M. Hahn, J. Bishop, Expression pattern of *Drosophila* ret suggests a common  
665 ancestral origin between the metamorphosis precursors in insect endoderm and the  
666 vertebrate enteric neurons. *Proc Natl Acad Sci USA* **98**, 1053-1058 (2001).
- 667 31. R. Sugaya, S. Ishimaru, T. Hosoya, K. Saigo, Y. Emori, A *Drosophila* homolog of  
668 human proto-oncogene ret transiently expressed in embryonic neuronal precursor  
669 cells including neuroblasts and CNS cells. *Mech Dev* **45**, 139-145 (1994).
- 670 32. L. Myers, H. Perera, M. G. Alvarado, T. Kidd, The *Drosophila* Ret gene functions in  
671 the stomatogastric nervous system with the Maverick TGFbeta ligand and the Gfrl co-  
672 receptor. *Development* **145** (2018).
- 673 33. A. Puschmann *et al.*, Heterozygous PINK1 p.G411S increases risk of Parkinson's  
674 disease via a dominant-negative mechanism. *Brain* **140**, 98-117 (2017).

- 675 34. E. M. Valente *et al.*, Hereditary early-onset Parkinson's disease caused by mutations  
676 in PINK1. *Science* **304**, 1158-1160 (2004).
- 677 35. E. M. Valente *et al.*, PINK1 mutations are associated with sporadic early-onset  
678 parkinsonism. *Annals of neurology* **56**, 336-341 (2004).
- 679 36. V. L. Hewitt, A. J. Whitworth, Mechanisms of Parkinson's disease: lessons from  
680 Drosophila. *Curr Top Dev Biol* **121**, 173-200 (2017).
- 681 37. A. Voigt, L. A. Berlemann, K. F. Winklhofer, The mitochondrial kinase PINK1:  
682 functions beyond mitophagy. *J Neurochem* **139 Suppl 1**, 232-239 (2016).
- 683 38. M. Vos, P. Verstreken, C. Klein, Stimulation of electron transport as potential novel  
684 therapy in Parkinson's disease with mitochondrial dysfunction. *Biochem Soc Trans*  
685 **43**, 275-279 (2015).
- 686 39. S. Schlee, P. Carmillo, A. Whitty, Quantitative analysis of the activation mechanism of  
687 the multicomponent growth-factor receptor Ret. *Nat Chem Biol* **2**, 636-644 (2006).
- 688 40. S. Jing *et al.*, GDNF-induced activation of the ret protein tyrosine kinase is mediated  
689 by GDNFR-alpha, a novel receptor for GDNF. *Cell* **85**, 1113-1124 (1996).
- 690 41. N. Asai, T. Iwashita, M. Matsuyama, M. Takahashi, Mechanism of activation of the ret  
691 proto-oncogene by multiple endocrine neoplasia 2A mutations. *Mol Cell Biol* **15**,  
692 1613-1619 (1995).
- 693 42. B. Freche *et al.*, Inducible dimerization of RET reveals a specific AKT deregulation in  
694 oncogenic signaling. *J Biol Chem* **280**, 36584-36591 (2005).
- 695 43. R. D. Read *et al.*, A Drosophila model of multiple endocrine neoplasia type 2.  
696 *Genetics* **171**, 1057-1081 (2005).
- 697 44. C. Abrescia, D. Sjostrand, S. Kjaer, C. F. Ibanez, Drosophila RET contains an active  
698 tyrosine kinase and elicits neurotrophic activities in mammalian cells. *FEBS Lett* **579**,  
699 3789-3796 (2005).
- 700 45. F. Takahashi *et al.*, AUREOCHROME, a photoreceptor required for  
701 photomorphogenesis in stramenopiles. *Proc Natl Acad Sci U S A* **104**, 19625-19630  
702 (2007).
- 703 46. T. Toyooka, O. Hisatomi, F. Takahashi, H. Kataoka, M. Terazima, Photoreactions of  
704 aureochrome-1. *Biophys J* **100**, 2801-2809 (2011).
- 705 47. E. Reichhart, A. Ingles-Prieto, A. M. Tichy, C. McKenzie, H. Janovjak, A phytochrome  
706 sensory domain permits receptor activation by red light. *Angew Chem Int Ed Engl* **55**,  
707 6339-6342 (2016).
- 708 48. M. J. Kennedy *et al.*, Rapid blue-light-mediated induction of protein interactions in  
709 living cells. *Nat Methods* **7**, 973-975 (2010).
- 710 49. B. D. Zoltowski, B. Vaccaro, B. R. Crane, Mechanism-based tuning of a LOV domain  
711 photoreceptor. *Nat Chem Biol* **5**, 827-834 (2009).
- 712 50. K. Sako *et al.*, Optogenetic control of nodal signaling reveals a temporal pattern of  
713 nodal signaling regulating cell fate specification during gastrulation. *Cell Rep* **16**, 866-  
714 877 (2016).

- 715 51. X. Z. Li *et al.*, Identification of a key motif that determines the differential surface  
716 levels of RET and TrkB tyrosine kinase receptors and controls depolarization  
717 enhanced RET surface insertion. *J Biol Chem* **287**, 1932-1945 (2012).
- 718 52. G. Paratcha *et al.*, Released GFRalpha1 potentiates downstream signaling, neuronal  
719 survival, and differentiation via a novel mechanism of recruitment of c-Ret to lipid  
720 rafts. *Neuron* **29**, 171-184 (2001).
- 721 53. M. Takahashi, N. Asai, T. Iwashita, H. Murakami, S. Ito, Mechanisms of development  
722 of multiple endocrine neoplasia type 2 and Hirschsprung's disease by ret mutations.  
723 *Rec Res Cancer Res* **154**, 229-236 (1998).
- 724 54. N. E. Baker, S. Y. Yu, The EGF receptor defines domains of cell cycle progression  
725 and survival to regulate cell number in the developing *Drosophila* eye. *Cell* **104**, 699-  
726 708 (2001).
- 727 55. M. Freeman, Reiterative use of the EGF receptor triggers differentiation of all cell  
728 types in the *Drosophila* eye. *Cell* **87**, 651-660 (1996).
- 729 56. R. L. Cagan, D. F. Ready, The emergence of order in the *Drosophila* pupal retina.  
730 *Dev Biol* **136**, 346-362 (1989).
- 731 57. K. Basler, B. Christen, E. Hafen, Ligand-independent activation of the sevenless  
732 receptor tyrosine kinase changes the fate of cells in the developing *Drosophila* eye.  
733 *Cell* **64**, 1069-1081 (1991).
- 734 58. J. M. Kramer, B. E. Staveley, GAL4 causes developmental defects and apoptosis  
735 when expressed in the developing eye of *Drosophila melanogaster*. *Genet Mol Res* **2**,  
736 43-47 (2003).
- 737 59. H. Wässle, H. J. Riemann, The mosaic of nerve cells in the mammalian retina. *Proc R*  
738 *Soc Lond B Biol Sci* **200**, 441-461 (1978).
- 739 60. J. E. Cook, Spatial properties of retinal mosaics: an empirical evaluation of some  
740 existing measures. *Vis Neurosci* **13**, 15-30 (1996).
- 741 61. J. Park *et al.*, Mitochondrial dysfunction in *Drosophila* PINK1 mutants is  
742 complemented by parkin. *Nature* **441**, 1157-1161 (2006).
- 743 62. D. Wang *et al.*, Antioxidants protect PINK1-dependent dopaminergic neurons in  
744 *Drosophila*. *Proc Natl Acad Sci U S A* **103**, 13520-13525 (2006).
- 745 63. Y. Yang *et al.*, Mitochondrial pathology and muscle and dopaminergic neuron  
746 degeneration caused by inactivation of *Drosophila* Pink1 is rescued by Parkin. *Proc*  
747 *Natl Acad Sci U S A* **103**, 10793-10798 (2006).
- 748 64. I. E. Clark *et al.*, *Drosophila* pink1 is required for mitochondrial function and interacts  
749 genetically with parkin. *Nature* **441**, 1162-1166 (2006).
- 750 65. G. Ranganayakulu, D. A. Elliott, R. P. Harvey, E. N. Olson, Divergent roles for NK-2  
751 class homeobox genes in cardiogenesis in flies and mice. *Development* **125**, 3037-  
752 3048 (1998).
- 753 66. Y. Y. Lin *et al.*, Three-wavelength light control of freely moving *Drosophila*  
754 *Melanogaster* for less perturbation and efficient social-behavioral studies. *Biomed Opt*  
755 *Express* **6**, 514-523 (2015).

- 756 67. M. Hori, K. Shibuya, M. Sato, Y. Saito, Lethal effects of short-wavelength visible light  
757 on insects. *Sci Rep* **4**, 7383 (2014).
- 758 68. J. C. Greene *et al.*, Mitochondrial pathology and apoptotic muscle degeneration in  
759 *Drosophila parkin* mutants. *Proc Natl Acad Sci U S A* **100**, 4078-4083 (2003).
- 760 69. P. Klein *et al.*, Ret rescues mitochondrial morphology and muscle degeneration of  
761 *Drosophila Pink1* mutants. *EMBO J* **33**, 341-355 (2014).
- 762 70. A. K. Lutz *et al.*, Loss of parkin or PINK1 function increases Drp1-dependent  
763 mitochondrial fragmentation. *J Biol Chem* **284**, 22938-22951 (2009).
- 764 71. D. P. Meka *et al.*, Parkin cooperates with GDNF/RET signaling to prevent  
765 dopaminergic neuron degeneration. *The Journal of clinical investigation* **125**, 1873-  
766 1885 (2015).
- 767 72. L. M. Mulligan, RET revisited: expanding the oncogenic portfolio. *Nat Rev Cancer* **14**,  
768 173-186 (2014).
- 769 73. E. R. Kramer, B. Liss, GDNF-Ret signaling in midbrain dopaminergic neurons and its  
770 implication for Parkinson disease. *FEBS Lett* **589**, 3760-3772 (2015).
- 771 74. D. T. Miller, R. L. Cagan, Local induction of patterning and programmed cell death in  
772 the developing *Drosophila* retina. *Development* **125**, 2327-2335 (1998).
- 773 75. H. E. Johnson *et al.*, The spatiotemporal limits of developmental Erk signaling. *Dev*  
774 *Cell* **40**, 185-192 (2017).
- 775 76. G. Guglielmi, J. D. Barry, W. Huber, S. De Renzis, An optogenetic method to  
776 modulate cell contractility during tissue morphogenesis. *Dev Cell* **35**, 646-660 (2015).
- 777 77. X. Wang, L. He, Y. I. Wu, K. M. Hahn, D. J. Montell, Light-mediated activation reveals  
778 a key role for Rac in collective guidance of cell movement in vivo. *Nat Cell Biol* **12**,  
779 591-597 (2010).
- 780 78. A. L. Patel *et al.*, Optimizing photoswitchable MEK. *Proc Natl Acad Sci U S A* **116**,  
781 25756-25763 (2019).
- 782 79. J. C. Greene, A. J. Whitworth, L. A. Andrews, T. J. Parker, L. J. Pallanck, Genetic and  
783 genomic studies of *Drosophila parkin* mutants implicate oxidative stress and innate  
784 immune responses in pathogenesis. *Hum Mol Genet* **14**, 799-811 (2005).
- 785 80. J. S. Valadas *et al.*, ER lipid defects in neuropeptidergic neurons impair sleep  
786 patterns in parkinson's disease. *Neuron* **98**, 1155-1169 e1156 (2018).
- 787 81. J. J. Lee *et al.*, Basal mitophagy is widespread in *Drosophila* but minimally affected by  
788 loss of Pink1 or parkin. *J Cell Biol* **217**, 1613-1622 (2018).
- 789 82. M. Vos *et al.*, Cardiolipin promotes electron transport between ubiquinone and  
790 complex I to rescue PINK1 deficiency. *J Cell Biol* **216**, 695-708 (2017).
- 791 83. J. H. Pogson *et al.*, The complex I subunit NDUFA10 selectively rescues *Drosophila*  
792 pink1 mutants through a mechanism independent of mitophagy. *PLoS Genet* **10**,  
793 e1004815 (2014).
- 794 84. V. A. Morais *et al.*, PINK1 loss-of-function mutations affect mitochondrial complex I  
795 activity via NdufA10 ubiquinone uncoupling. *Science* **344**, 203-207 (2014).

- 796 85. E. S. Vincow *et al.*, The PINK1-Parkin pathway promotes both mitophagy and  
797 selective respiratory chain turnover in vivo. *Proc Natl Acad Sci U S A* **110**, 6400-6405  
798 (2013).
- 799 86. M. Vos *et al.*, Vitamin K2 is a mitochondrial electron carrier that rescues pink1  
800 deficiency. *Science* **336**, 1306-1310 (2012).
- 801 87. B. Kloo *et al.*, Critical role of PI3K signaling for NF-kappaB-dependent survival in a  
802 subset of activated B-cell-like diffuse large B-cell lymphoma cells. *Proc Natl Acad Sci*  
803 *U S A* **108**, 272-277 (2011).
- 804 88. S. Jeay, S. Pianetti, H. M. Kagan, G. E. Sonenshein, Lysyl oxidase inhibits ras-  
805 mediated transformation by preventing activation of NF-kappa B. *Mol Cell Biol* **23**,  
806 2251-2263 (2003).
- 807 89. C. S. Shi, J. H. Kehrl, PYK2 links G(q)alpha and G(13)alpha signaling to NF-kappa B  
808 activation. *J Biol Chem* **276**, 31845-31850 (2001).
- 809 90. H. Takayama *et al.*, Diverse tumorigenesis associated with aberrant development in  
810 mice overexpressing hepatocyte growth factor/scatter factor. *Proc Natl Acad Sci U S*  
811 *A* **94**, 701-706 (1997).
- 812 91. S. E. Kahn, Incretin therapy and islet pathology: a time for caution. *Diabetes* **62**,  
813 2178-2180 (2013).
- 814 92. A. Kharitonov *et al.*, FGF-21 as a novel metabolic regulator. *The Journal of clinical*  
815 *investigation* **115**, 1627-1635 (2005).
- 816 93. T. F. Zioncheck *et al.*, The pharmacokinetics, tissue localization, and metabolic  
817 processing of recombinant human hepatocyte growth factor after intravenous  
818 administration in rats. *Endocrinology* **134**, 1879-1887 (1994).
- 819 94. R. T. Bartus, M. S. Weinberg, R. J. Samulski, Parkinson's disease gene therapy:  
820 success by design meets failure by efficacy. *Mol Ther* **22**, 487-497 (2014).
- 821 95. M. Decressac *et al.*, alpha-Synuclein-induced down-regulation of Nurr1 disrupts  
822 GDNF signaling in nigral dopamine neurons. *Sci Transl Med* **4**, 163ra156 (2012).
- 823 96. N. Volakakis *et al.*, Nurr1 and retinoid X receptor ligands stimulate ret signaling in  
824 dopamine neurons and can alleviate alpha-synuclein disrupted gene expression. *J*  
825 *Neurosci* **35**, 14370-14385 (2015).
- 826 97. A. Ingles-Prieto *et al.*, Light-assisted small-molecule screening against protein  
827 kinases. *Nat Chem Biol* **11**, 952-954 (2015).
- 828 98. S. Sun, J. Elwood, W. C. Greene, Both amino- and carboxyl-terminal sequences  
829 within I kappa B alpha regulate its inducible degradation. *Mol Cell Biol* **16**, 1058-1065  
830 (1996).
- 831 99. Q. Caudron, C. Lyn-Adams, J. A. D. Aston, B. G. Frenguelli, K. G. Moffat,  
832 Quantitative assessment of ommatidial distortion in *Drosophila melanogaster*. *Dros*  
833 *Inf Serv* **96**, 136-144 (2013).
- 834 100. Y. O. Ali, W. Escala, K. Ruan, R. G. Zhai, Assaying locomotor, learning, and memory  
835 deficits in *Drosophila* models of neurodegeneration. *J Vis Exp* (2011).
